# Supplementary material for: Heptazine-based graphitic carbon nitride as an effective hydrogen purification membrane
Source: Royal Society of Chemistry journal article supplement (doi:10.1039/c6ra06425f), 2016-01-01
Supplement: c6ra06425f1.pdf [file c6ra06425f1.pdf]

## Supporting Information

### Heptazine-based graphitic carbon nitride as an efficient hydrogen purification membrane

Yujin Ji,<sup>†</sup> Huilong Dong,<sup>†</sup> Haiping Lin,<sup>†\*</sup> Liling Zhang,<sup>†</sup> Tingjun Hou,<sup>†</sup> Youyong Li<sup>†\*</sup>

<sup>†</sup>Institute of Functional Nano & Soft Materials (FUNSOM), Jiangsu Key Laboratory for Carbon-Based Functional Materials & Devices, Soochow University, Suzhou, Jiangsu 215123, China.

Email: [yyli@suda.edu.cn](mailto:yyli@suda.edu.cn), [hplin@suda.edu.cn](mailto:hplin@suda.edu.cn)

We test the influence of the periodicity of the adsorbates on the energy barrier. The permeation barrier of H<sub>2</sub> through 1×1 g-C<sub>3</sub>N<sub>4</sub> is 0.55 eV and it through 2×2 g-C<sub>3</sub>N<sub>4</sub> is 0.48 eV. The permeation barriers of gas molecules permeating 2x2 supercells are 0.1~0.2 eV lower than that in the 1x1 unit cell, indicating that the periodicity of adsorbates plays a role in the energy barriers. However, every pore of g-C<sub>3</sub>N<sub>4</sub> is a possible pathway to diffuse when the surrounding is filled with massive gas molecules. Thus the structure of unit cell is adopted in our paper.

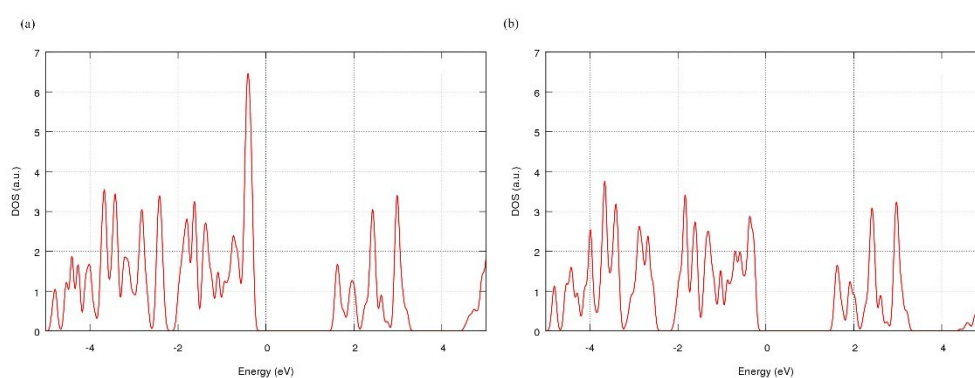

**Figure S1.** DOS of (a) H<sub>2</sub>O adsorbed on g-C<sub>3</sub>N<sub>4</sub> and (b) pure buckled g-C<sub>3</sub>N<sub>4</sub>.

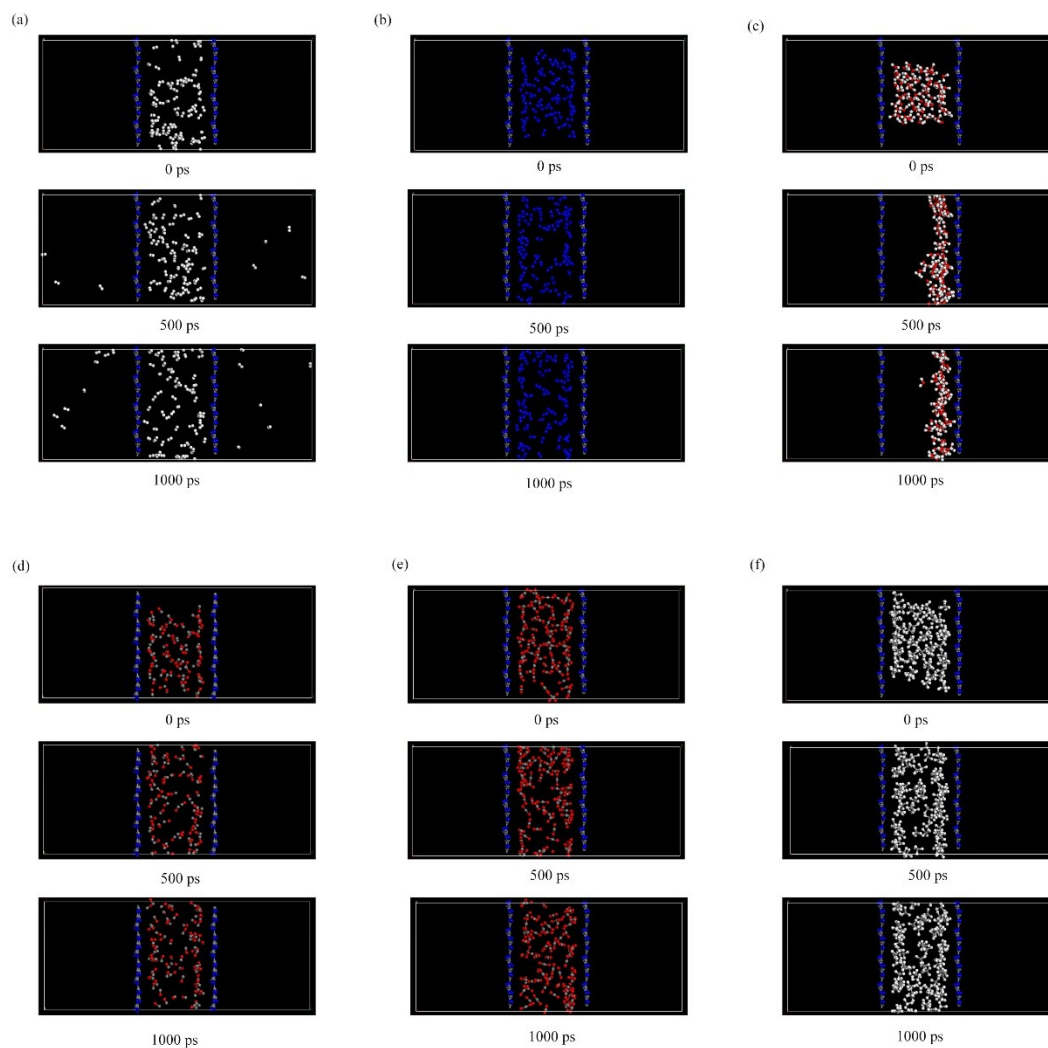

**Figure S2.** Snapshots of (a)  $\text{H}_2$ , (b)  $\text{N}_2$ , (c)  $\text{H}_2\text{O}$ , (d)  $\text{CO}$ , (e)  $\text{CO}_2$  and (f)  $\text{CH}_4$  permeating through  $\text{g-C}_3\text{N}_4$  nanosheet in the 0~1000ps MD simulation at 300K. The blue, grey, white and red beads represent the nitrogen, carbon, hydrogen, and oxygen atoms respectively.
